# Supplementary material
Source: HighWire-hosted journal article supplement (https://www.annals.org/content/suppl/2006/11/02/145.9.654)
Supplement: Boolchand_DB_145-9-654-DCA1-A1.pdf [file Boolchand_DB_145-9-654-DCA1-A1.pdf]

October 27, 2004

Dear Doctor,

I am a second year internal medicine resident interested in gastroenterology at University Hospitals of Cleveland. Could you please take a few moments out of your busy schedule to help me in my research project?

Colorectal cancer screening and surveillance is a major health care issue in gastroenterology today. Primary care physicians are becoming responsible for referring patients back for repeat surveillance colonoscopy. I am very interested in studying what determines the interval for colonoscopy surveillance in clinical practice.

To this end, I have developed a survey that presents 6 short clinical vignettes. I would appreciate it if you would take **three minutes** to complete the enclosed survey and return it to me in the stamped envelope through the mail. Your responses will be kept completely confidential. If you have any questions you may contact me through email at [vikramboolchand@yahoo.com](mailto:vikramboolchand@yahoo.com) or by telephone at 216-965-7427.

Thank you in advance.

Sincerely,

Vikram Boolchand, MD  
Internal Medicine Resident  
University Hospitals of Cleveland
